# Supplementary material for: Sport and dance interventions for healthy young people (15–24 years) to promote subjective well-being: a systematic review
Source: PubMed Central journal article supplement (PMC6082460; doi:10.1136/bmjopen-2017-020959), 2018-07-15
Supplement: bmjopen-2017-020959supp001.pdf [file bmjopen-2017-020959supp001.pdf]

## OVID MEDLINE Search Strategy

1. MeSH descriptor: [well being]
2. well-being
3. wellbeing
4. "young people".mp or youth.mp or adolescent\*.mp
5. sport/ or sport.mp.
6. "physical activity".mp or "physical activity"/
7. Exercise\*.mp.
8. "physical exertion".mp.
9. dance\*.mp.
10. game\*.mp.
11. team.mp.
12. bike.mp.
13. cycl\*.mp.
14. cheerlead\*.mp.
15. equestrian.mp.
16. swim\*.mp.
17. gym\* .mp.
18. sail\*.mp.
19. canoe\*.mp.
20. kayak\*
21. bloodsport\*.mp.
22. boxing.mp
23. "martial arts".mp.
24. fitness.mp.
25. ballet.mp.
26. choreograph\*
27. "work-out".mp.
28. (1 or 2 or 3) and (4) and (or 5 or 6 or 7 or 8 or 9 or 10 or 11 or 12 or 13 or 14 or 15 or 16 or 17 or 18, or 19 or 20 or 21 or 22 or 23 or 24 or 25 or 26 or 27)
29. tournament.mp

30. match.mp
31. competition.mp
32. festival.mp
33. battle.mp
34. league.mp
35. team\*.mp
36. theatre\*.mp
37. event\*.mp
38. meet\*.mp
39. field\*.mp
40. fan.mp
41. play\*.mp
42. athlet\*.mp
43. attend\*.mp
44. spectat\*.mp
45. participat\*.mp
46. perform\*.mp
47. 28 and (29 or 30 or 31 or 32 or 33 or 34 or 35 or 36 or 37 or 38 or 39 or 40 or 41 or 42 or 43 or 44 or 45 or 46)
48. Quality of life.mp. or "Quality of Life"/ Life
49. Anxiety/ or anxiety.mp.
50. self-esteem.mp.
51. loneliness/ or lonel. mp.
52. life adj satisfaction.mp.
53. happiness.mp.
54. worthwhileness.mp.
55. 47 and (48 or 49 or 50 or 51 or 52 or 53 or)
56. limit 54 to humans and all young people or adolescents
