# Supplementary material for: Sport and dance interventions for healthy young people (15–24 years) to promote subjective well-being: a systematic review
Source: PubMed Central journal article supplement (PMC6082460; doi:10.1136/bmjopen-2017-020959), 2018-07-15
Supplement: bmjopen-2017-020959supp002.pdf [file bmjopen-2017-020959supp002.pdf]

Table of excluded studies

| Authors                                                                                                              | Year | Reason for exclusion |
|----------------------------------------------------------------------------------------------------------------------|------|----------------------|
| Adie JW, Duda JL, Ntoumanis N.                                                                                       | 2008 | Intervention         |
| Ahola R, Pyky R, Jämsä T, Mäntysaari M, Koskimäki H, Ikäheimo TM, Huotari ML, Röning J, Heikkinen HI, Korpelainen R. | 2013 | Study design         |
| Altintas A, Asci FH, Kin-Isler A, Guven-Karahan B, Kelecek S, Ozkan A, Yilmaz A, Kara FM.                            | 2014 | Population           |
| Anamaria Constantinescu.                                                                                             | 2013 | Outcome              |
| Aphamis G, Giannaki CD, Tsouloupas CN, Ioannou Y, Hadjicharalambous M.                                               | 2015 | Outcome              |
| Aramendi Jauregui P, Bujan Vidales K, Arburua Goyeneche R.                                                           | 2014 | Intervention         |
| Arts Council England                                                                                                 | 2006 | Year                 |
| Bamford, C.                                                                                                          | 2015 | Study design         |
| Barton J, Pretty J.                                                                                                  | 2010 | Study Design         |
| Beresford B, Clarke S.                                                                                               | 2009 | Year                 |
| Berntsson LT, Ringsberg KC.                                                                                          | 2014 | Intervention         |
| BHF National Centre                                                                                                  | 2014 | Study design         |
| Black Country Consortium Ltd                                                                                         | 2014 | Outcome              |
| Blazy L, Amstel S                                                                                                    | NR   | Study design         |
| Booker CL, Skew AJ, Kelly YJ, Sacker A.                                                                              | 2015 | Intervention         |
| Booker CL, Skew AJ, Sacker A, Kelly YJ.                                                                              | 2014 | Intervention         |
| Boyer EM.                                                                                                            | 2007 | Year                 |
| Brand S, Gerber M, Beck J, Hatzinger M, Pühse U, Holsboer-Trachsler E.                                               | 2010 | Intervention         |
| Brassai L, Piko BF, Steger MF.                                                                                       | 2011 | Intervention         |
| Brodáni J, Spišiak M, Paška L.                                                                                       | 2015 | Intervention         |
| Brown DR, Carroll DD, Workman LM, Carlson SA, Brown DW.                                                              | 2014 | Population           |
| Buckinghamshire County Council                                                                                       | NR   | Study design         |
| Burgess G, Grogan S, Burwitz L.                                                                                      | 2006 | Population           |

|                                                                            |      |                                        |
|----------------------------------------------------------------------------|------|----------------------------------------|
| Casey MM, Harvey JT, Telford A, Eime RM, Mooney A, Payne WR.               | 2014 | Population                             |
| Castillo I, Duda JL, Alvarez MS, Merce J, Balaguer I.                      | 2011 | Population                             |
| Chatzisarantis NLD, Hagger MS.                                             | 2007 | Intervention                           |
| Chen LH, Kee YH.                                                           | 2008 | Intervention                           |
| Chen LH, Kee YH, Chen MY.                                                  | 2015 | Outcome                                |
| Crossick G, Kaszynska P.                                                   | 2016 | Intervention                           |
| Dance is Public Health                                                     | 2015 | Study design                           |
| Daniels E, Leaper C.                                                       | 2006 | Intervention                           |
| D'anna C, Rio L, Paloma FG.                                                | 2015 | Intervention                           |
| De Bruin AP, Woertman L, Bakker FC, Oudejans RRD.                          | 2009 | Intervention                           |
| Department of Health, Physical Activity, Health Improvement and Protection | 2011 | Year                                   |
| Department of Culture, Arts and Leisure                                    | 2009 | Year                                   |
| Di Luzio SS, Procentese F, Guillet-Descas E.                               | 2014 | Not available from the British Library |
| Doerksen SE, Elavsky S, Rebar AL, Conroy DE.                               | 2014 | Intervention                           |
| Englefield L, Cunningham D, Mahoney A, Stone T, Torrance H.                | 2016 | Outcome                                |
| Eime RM, Harvey JT, Brown WJ, Payne WR.                                    | 2010 | Study design                           |
| Falconer C.                                                                | 2010 | Year                                   |
| Findlay LC, Bowker A.                                                      | 2009 | Population                             |
| Fløtnes IS, Nilsen TIL, Augestad LB.                                       | 2011 | Intervention                           |
| Fujiwara D, Kudrna L, Cornwall T, Laffan K, Dolan P.                       | 2015 | Outcome                                |
| Fujiwara D, Kudrna L, Dolan P.                                             | 2014 | Population                             |
| Fujiwara D, Kudrna L, Dolan P.                                             | 2014 | Outcome                                |
| Fujiwara D, MacKerron G.                                                   | 2015 | Intervention                           |
| Gardner SM, Komesaroff P, Fensham R.                                       | 2008 | Intervention                           |
| Geyer J.                                                                   | 2013 | Intervention                           |

|                                                                                                             |      |              |
|-------------------------------------------------------------------------------------------------------------|------|--------------|
| Gondoh Y, Sensui H, Kinomura S, Fukuda H, Fujimoto T, Masud M, Nagamatsu T, Tamaki H, Takekura H.           | 2009 | Population   |
| Hagensen KP.                                                                                                | 2015 | Population   |
| Hidalgo-Rasmussen CA, Ramírez-López G, Martín AH-S.                                                         | 2013 | Intervention |
| HM Government                                                                                               | 2016 | Outcome      |
| Holland J.                                                                                                  | 2012 | Year         |
| Ivanović M, Milosavljević S, Ivanović U.                                                                    | 2015 | Outcome      |
| Jago R, Sebire SJ, Davies B, Wood L, Banfield K, Edwards MJ, Powell JE, Montgomery AA, Thompson JL, Fox KR. | 2015 | Population   |
| Jalaludin B, Maxwell M, Saddik B, Lobb E, Byun R, Gutierrez R, Paszek J.                                    | 2012 | Population   |
| Jančiauskas R.                                                                                              | 2012 | Population   |
| Jelalian E, Hart CN, Mehlenbeck RS, Lloyd-Richardson EE, Kaplan JD, Flynn-O'Brien KT, Wing RR.              | 2008 | Outcome      |
| Jonsdottir IH, Börjesson M, Ahlberg Jr. G.                                                                  | 2011 | Population   |
| Jowett GE.                                                                                                  | 2014 | Outcome      |
| Kaczmarek LD, Drązkowski D.                                                                                 | 2014 | Intervention |
| Kallings LV, Leijon M, Hellénus M-L, Ståhle A.                                                              | 2008 | Population   |
| Kantor RM, Grimes GR, Limbers CA.                                                                           | 2015 | Population   |
| Karadağ Çaman Ö, Özcebe H.                                                                                  | 2011 | Intervention |
| Kardefelt-Winther D.                                                                                        | 2014 | Intervention |
| Kavetsos G, Szymanski S.                                                                                    | 2010 | Study design |
| Kelly P, Matthews A, Foster C.                                                                              | 2012 | Year         |
| Kelly NR, Mazzeo SE, Evans RK, Stern M, Thacker LF, Thornton LM, Laver JH.                                  | 2011 | Population   |
| Kern ML, Waters LE, Adler A, White MA.                                                                      | 2015 | Intervention |
| Khan Y, Taghdisi MH, Nourijelyani K.                                                                        | 2015 | Intervention |
| Kim J, Suh W, Kim S, Gopalan H.                                                                             | 2012 | Intervention |
| Kipp LE, Weiss MR.                                                                                          | 2013 | Population   |
| Knab AM, Nieman DC, Sha W, Broman-Fulks JJ, Canu WH.                                                        | 2012 | Population   |

|                                                                        |      |                                  |
|------------------------------------------------------------------------|------|----------------------------------|
| Knifsend CA.                                                           | 2015 | Population                       |
| Komlosi, E                                                             | 2014 | Intervention                     |
| Kort-Butler LA, Hagewen KJ.                                            | 2011 | Intervention                     |
| Kowert R, Vogelgesang J, Festl R, Quandt T.                            | 2015 | Intervention                     |
| Lafrenière MA, Vallerand RJ, Donahue EG, Lavigne GL.                   | 2009 | Intervention                     |
| Laure P, Binsincer C.                                                  | 2009 | Population                       |
| Laure P, Binsincer C.                                                  | 2009 | Population                       |
| Laurendeau J.                                                          | 2014 | Intervention                     |
| Lazaridou A, Kalogianni C.                                             | 2013 | Outcome                          |
| Le Menestrel S, Perkins DF.                                            | 2007 | Intervention                     |
| Lee AJY, Lin WH.                                                       | 2007 | Outcome                          |
| Lee BW, Leeson PRC.                                                    | 2015 | Intervention                     |
| Leggett, Diane K.                                                      | 2010 | Intervention                     |
| Lestan KA, Eržen I, Golobič M.                                         | 2014 | Population                       |
| Lerversen I, Danielsen AG, Birkeland MS, Samdal O.                     | 2012 | Study Design                     |
| Lieber SB, Redberg RF, Blumenthal RS, Gandhi A, Robb KJ, Mora S.       | 2012 | Population                       |
| Liu M, Wu L, Ming Q.                                                   | 2015 | Study Design – Systematic Review |
| Lopez-Walle J, Balaguer I, Castillo I, Tristan J.                      | 2012 | Population                       |
| Lorger M, Mrakovic S, Hraski M.                                        | 2012 | Population                       |
| LSE Housing and Communities team                                       | 2015 | Study design                     |
| Lu FJH, Hsu YW.                                                        | 2013 | Intervention                     |
| Lupu E, Petrescu A.L.                                                  | 2012 | Study Design                     |
| Mack DE, Wilson PM, Gunnell KE, Gilchrist JD, Kowalski KC, Crocker PR. | 2012 | Study design                     |
| Madison G, Paulin J, Aasa U.                                           | 2013 | Population                       |
| Maffulli N, Longo UG, Spiezia F, Denaro V.                             | 2010 | Intervention                     |
| Magnusson M, Hallmyr Lewis M, Smaga-Blom M, Lissner L, Pickering C.    | 2014 | Study Design                     |

|                                                                                                                                                                                                                                                                                                                                        |      |                                        |
|----------------------------------------------------------------------------------------------------------------------------------------------------------------------------------------------------------------------------------------------------------------------------------------------------------------------------------------|------|----------------------------------------|
| Mäkinen M., Lindberg N., Komulainen E., Puukko-Viertomies L.-R., Aalberg V., Marttunen M.                                                                                                                                                                                                                                              | 2015 | Population                             |
| Mancini, JA; Bowen, GL; O'Neal, CW; Arnold, AL                                                                                                                                                                                                                                                                                         | 2015 | Intervention                           |
| Mansfield L, Kay T, Anokye N, Fox-Rushby J.                                                                                                                                                                                                                                                                                            | 2015 | Study design                           |
| Martin-Albo, J; Nunez, JL; Dominguez, E; Leon, J; Tomas, JM                                                                                                                                                                                                                                                                            | 2012 | Population                             |
| Maugendre M., Spitz E.                                                                                                                                                                                                                                                                                                                 | 2011 | Study Design                           |
| McDade-Montez, Elizabeth; Wallander, Jan; Elliott, Marc;Grunbaum,Jo Anne; Tortolero, Susan; Cuccaro, Paula; Schuster, Mark A.                                                                                                                                                                                                          | 2015 | Intervention                           |
| McGee, R., Williams, S., Howden-Chapman, P., Martin, J. and Kawachi, I                                                                                                                                                                                                                                                                 | 2006 | Study design                           |
| McMahon E.M., Corcoran P., O'Regan G., Keeley H., Cannon M., Carli V., Wasserman C., Hadlaczky G., Sarchiapone M., Apter A., Balazs J., Balint M., Bobes J., Brunner R., Cozman D., Haring C., Iosue M., Kaess M., Kahn J.-P., Nemes B., Podlogar T., Poštuvan V., Sáiz P., Sisask M., Tubiana A., Värnik P., Hoven C.W., Wasserman D. | 2016 | Population                             |
| Medeiros M.D., De Castro Filho J.A.                                                                                                                                                                                                                                                                                                    | 2014 | Not available from the British Library |
| Mental Health Foundation                                                                                                                                                                                                                                                                                                               | 2013 | Study design                           |
| Merrill R.M., Aldana S.G., Bowden D.E.                                                                                                                                                                                                                                                                                                 | 2010 | Population                             |
| Mihaela, Cristuță Alina                                                                                                                                                                                                                                                                                                                | 2012 | Population                             |
| Mochon, D; Norton, MI; Ariely, D                                                                                                                                                                                                                                                                                                       | 2008 | Population                             |
| Mohan S., Smith C.A., Corriveau N.L., Kline-Rogers E., Jackson E.A., Eagle K.A., Goldberg C., Durussel-Weston J.                                                                                                                                                                                                                       | 2012 | Intervention                           |
| Moljord I., Moksnes U.K., Eriksen L., Espnes G.A.                                                                                                                                                                                                                                                                                      | 2011 | Study Design                           |
| Molina J.J.M., Castillo A.S., De La Serrana H.L.G., Díaz M.Z.                                                                                                                                                                                                                                                                          | 2009 | Population                             |
| Molina-Garcia J, Castillo I, Queralt A                                                                                                                                                                                                                                                                                                 | 2011 | Study Design                           |
| Moutão J., Alves S.M., Monteiro D., Cid L.                                                                                                                                                                                                                                                                                             | 2015 | Population                             |
| Nicholls L., Lewis A.J., Petersen S., Swinburn B., Moodie M., Millar L.                                                                                                                                                                                                                                                                | 2014 | Intervention                           |
| Noack P., Kauper T., Benbow A.E.F., Eckstein K.                                                                                                                                                                                                                                                                                        | 2013 | Study Design                           |
| Oliver, S.                                                                                                                                                                                                                                                                                                                             | 2009 | Year                                   |
| Optimity Advors                                                                                                                                                                                                                                                                                                                        | 2016 | Population                             |

|                                                                                                                              |      |                                     |
|------------------------------------------------------------------------------------------------------------------------------|------|-------------------------------------|
| Orkibi H., Ronen T., Assoulin N.                                                                                             | 2014 | Population                          |
| Papaioannou A.G., Appleton P.R., Torregrosa M., Jowett G.E., Bosselut G., Gonzalez L., Haug E., Ertesvaag V., Zourbanos N.   | 2013 | Population                          |
| Peng W., Crouse J.                                                                                                           | 2013 | Outcome                             |
| Pérez Ugidos, Guillermo; Laíño, Fernando, A.; Zelarayán, Julio; Márquez, Sara                                                | 2014 | Intervention                        |
| Phillips G Renton A Moore DG Bottomley C Schmidt E Lais S Yu G Wall M<br>Tobi P Frostick C Clow A Lock K Petticrew M Hayes R | 2012 | Population                          |
| Physical Activity Council                                                                                                    | 2016 | Intervention                        |
| Piqueras J.A., Kuhne W., Vera-Villarroel P., Van Straten A., Cuijpers P.                                                     | 2011 | Study Design                        |
| Play Wales                                                                                                                   | 2012 | Year                                |
| Precor                                                                                                                       | NR   | Study design                        |
| Proctor C., Tsukayama E., Wood A.M., Maltby J., Eades J.F., Linley P.A.                                                      | 2011 | Intervention                        |
| Public Health England                                                                                                        | 2015 | Study design                        |
| Pyky, R; Jauho, AM; Ahola, R; Ikaheimo, TM; Koivumaa-Honkanen, H;<br>Manysaari, M; Jamsa, T; Korpelainen, R                  | 2015 | Intervention                        |
| Reding, Frank N; Grieve, Frederick; Derryberry, W. Pitt; Paquin, Anthony R                                                   | 2011 | Outcome                             |
| Riley A., Anderson-Butcher D.                                                                                                | 2012 | Population                          |
| Rössler R., Donath L., Verhagen E., Junge A., Schweizer T., Faude O.                                                         | 2014 | Study Design –<br>Systematic Review |
| Rotheram-Borus M.J., Swendeman D., Becker K.D.                                                                               | 2014 | Population                          |
| Ryan., K, Mind                                                                                                               | 2015 | Intervention                        |
| Sagar, S.S.                                                                                                                  | 2007 | Year                                |
| Sagatun, A., Sjøgaard, A.J., Bjertness, E., Selmer, R. and Heyerdahl, S                                                      | 2007 | Study design                        |
| Sage, L; Kavussanu, M                                                                                                        | 2010 | Population                          |
| Salehi, A; Harris, N; Sebar, B; Coyne, E                                                                                     | 2015 | Population                          |
| Schlarb A.A., Schwedler V., Feichtinger P.                                                                                   | 2012 | Study Design                        |
| Schmiedeberg C., Schröder J.                                                                                                 | 2016 | Population                          |

|                                                                                                           |      |              |
|-----------------------------------------------------------------------------------------------------------|------|--------------|
| Schuch F.B., Pinto S.S., Bagatini N.C., Zaffari P., Alberton C.L., Cadore E.L., Silva R.F., Kruehl L.F.M. | 2014 | Population   |
| Schulz, KH; Meyer, A; Langguth, N                                                                         | 2012 | Population   |
| Schwanen, T; Wang, DG                                                                                     | 2014 | Population   |
| Sekot A.                                                                                                  | 2013 | Population   |
| Sellakumar G.K.                                                                                           | 2015 | Intervention |
| Shaffer-Hudkins, Emily                                                                                    | 2012 | Population   |
| Shiue, I                                                                                                  | 2016 | Population   |
| Sidoti E., Paolini G., Tringali G.                                                                        | 2010 | Population   |
| Sigvartsen J., Gabrielsen L.E., Abildsnes E., Stea T.H., Omfjord C.S., Rohde G.                           | 2016 | Study Design |
| Sjögren K., Hansson E.E., Stjernberg L.                                                                   | 2011 | Population   |
| Skianis, V.                                                                                               | 2013 | Intervention |
| Slough Borough Council                                                                                    | NR   | Year         |
| Smyth, W.                                                                                                 | NR   | Population   |
| Snyder A.R., Martinez J.C., Bay R.C., Parsons J.T., Sauers E.L., McLeod T.C.V.                            | 2010 | Study Design |
| Spandler H Mckeown M Roy A Hurley M                                                                       | 2013 | Population   |
| Spengler, Sarah; Woll, Alexander                                                                          | 2013 | Population   |
| Sport and Recreation Alliance                                                                             | 2012 | Year         |
| Sport and Recreation Alliance                                                                             | 2016 | Study Design |
| Stein C., Fisher L., Berkey C., Colditz G.                                                                | 2007 | Population   |
| Stenseng, Frode; Forest, Jacques; Curran, Thomas                                                          | 2015 | Population   |
| StreetGames                                                                                               | 2016 | Study design |
| Stubbe J.H., de Moor M.H.M., Boomsma D.I., de Geus E.J.C.                                                 | 2007 | Population   |
| Student Sport Ireland                                                                                     | 2016 | Outcome      |
| Suendermann, S.,                                                                                          | 2015 | Population   |
| Sztankovics A.                                                                                            | 2013 | Population   |
| Tanimaru J.H., Dos Santos A.L.P.                                                                          | 2016 | Study Design |

|                                                                                                         |      |                                        |
|---------------------------------------------------------------------------------------------------------|------|----------------------------------------|
| Taylor, P., Davies, L., Wells, P., Gilbertson, J. & Tayleur, W.                                         | 2015 | Study design                           |
| Tharenos C.L., Santorino D.                                                                             | 2009 | Not available from the British Library |
| The Department of Culture, Arts and Leisure                                                             | 2009 | Year                                   |
| Thøgersen-Ntoumani C., Ntoumanis N.                                                                     | 2006 | Population                             |
| Thomley B.S., Ray S.H., Cha S.S., Bauer B.A.                                                            | 2011 | Population                             |
| TOP Foundation                                                                                          | 2014 | Study design                           |
| UK Community Foundations                                                                                | 2012 | Year                                   |
| Urmston, E.                                                                                             | 2012 | Year                                   |
| Urmston, E.                                                                                             | 2013 | Population                             |
| Vilela C., Gomes A.R.                                                                                   | 2015 | Intervention                           |
| Wall M., Hayes R., Moore D., Petticrew M., Clow A., Schmidt E., Draper A., Lock K., Lynch R., Renton A. | 2009 | Study design                           |
| Watson, B., Lashua, B., Trevorrow, P.                                                                   | 2016 | Outcome                                |
| Whitehead, S.H.                                                                                         | 2005 | Year                                   |
| Wicker, P; Coates, D; Breuer, C                                                                         | 2015 | Population                             |
| Wicker, P; Frick, B                                                                                     | 2015 | Population                             |
| Williams K., Davis III O., Gittelman M., Pomerantz W.J.                                                 | 2006 | Population                             |
| Williams, G. & Jacques, K.                                                                              | NR   | Population                             |
| Woodall, J; White, J; South, J                                                                          | 2013 | Population                             |
| Yamada K., Kawata Y., Nakajima N., Hirosawa M.                                                          | 2012 | Outcome                                |
| Zook K.R., Saksvig B.I., Wu T.T., Young D.R.                                                            | 2014 | Outcome                                |
| Zullig, Keith J.; White, Rebecca J.                                                                     | 2011 | Population                             |
